# Supplementary material
Source: HighWire-hosted journal article supplement (https://jcptest-stage.highwire.org/content/jclinpath-2020-207040)
Supplement: inline-supplementary-material-3 [file inline-supplementary-material-3.pdf]

**Supplementary Table 2 – Next Generation Sequencing (NGS) result of MMR-deficient cases (excluding cases with *MLH1* promoter hypermethylation)**

Variants are either likely pathogenic (class 4) or pathogenic (class 5) unless otherwise specified.

**Abbreviations:** VAF = Variant allele frequency. LOH = Loss of heterozygosity. SNP = Single Nucleotide Polymorphism. NP = not performed. VAF = Variant allele frequency.

**Immunohistochemistry results:** + = normal nuclear staining. - = loss of staining in neoplastic cells with positive internal controls. +/- = weak staining in neoplastic cells.

\* since germline variants may be unique to a family/person, only a general description of the germline variant type is given to protect privacy and maintain data accuracy.

| Study ID | Resection or biopsy | Immunohistochemistry pattern |      |        |        | NGS results neoplastic tissue |                                                      |                |                                 | Variant detected in non-neoplastic tissue |
|----------|---------------------|------------------------------|------|--------|--------|-------------------------------|------------------------------------------------------|----------------|---------------------------------|-------------------------------------------|
|          |                     | PMS2                         | MLH1 | MSH6   | MSH2   | Gene                          | Variant                                              | VAF : coverage | LOH                             |                                           |
| 3        | Resection           | +                            | np   | + / ++ | -      | MSH2                          | Nonsense variant*                                    | 0.779:715      | Probable based on 1 SNP and VAF | Yes                                       |
| 18       | Biopsy              | -                            | -    | +      | np     |                               | No relevant variants detected                        |                |                                 |                                           |
| 33       | Resection           | +                            | np   | -      | + / ++ | MSH2                          | NM_000251.2:c.1777C>T                                | 0.480:125      | No                              | No                                        |
|          |                     |                              |      |        |        |                               | Deletion exon 1                                      |                |                                 | No                                        |
| 46       | Resection           | -                            | +    | +      | np     |                               | NGS data of insufficient quality                     |                |                                 |                                           |
| 48       | Resection           | -                            | +    | +      | +      | MLH1                          | NM_000249.3:c.112A>C                                 | 0.48:448       | No informative SNPs             | Normal tissue not available               |
| 71       | Resection           | +                            | np   | -      | + / ++ |                               | No relevant variants detected                        |                |                                 |                                           |
| 85       | Resection           | Failed                       | np   | -      | +      | MLH1                          | Missense variant classified as pathogenic by InSiGHT | 0.479:1308     | No informative SNPs             | Yes                                       |
|          |                     |                              |      |        |        |                               | NM_000249.3:c.1513_1520dup                           | 0.168:1985     |                                 | No                                        |
|          |                     |                              |      |        |        | MSH6                          | C-deletion                                           |                |                                 |                                           |
| 94       | Resection           | -                            | -    | +      | np     | MLH1                          | NM_000249.3:c.676C>T                                 |                | yes                             | Not performed                             |
| 98       | Resection           | +                            | np   | -      | + / ++ | MSH6                          | Frameshift variant*                                  | 0.483:1989     | No                              | Yes                                       |
|          |                     |                              |      |        |        |                               | NM_000179.2:c.3743del                                | 0.329:1989     |                                 | No                                        |
| 118      | Resection           | +                            | np   | -      | -      |                               | NGS data of insufficient quality                     |                |                                 |                                           |
| 119      | Resection           | -                            | +    | +      | np     | PMS2                          | Frameshift variant*                                  | 0.498:1933     | yes                             | Yes                                       |

|     |           |             |    |      |        |      |                                                              |                |                                         |                                        |
|-----|-----------|-------------|----|------|--------|------|--------------------------------------------------------------|----------------|-----------------------------------------|----------------------------------------|
| 119 | Resection | -           | T  | T    | np     | MSH2 | NM_000251.2:c.187dup                                         | 0.204:1967     |                                         | No                                     |
| 124 | Resection | +           | np | -    | failed |      | No relevant variants detected                                |                |                                         | According to PA-report this is a Lynch |
| 156 | Resection | +           | np | -    | -      | MSH2 | NM_000251.2:c.2027C>G                                        | 0.219:283      | No informative SNPs                     | Not performed                          |
| 206 | Resection | -           | -  | +    | np     | MLH1 | Frameshift variant*                                          | 0.429:1919     | No informative SNPs                     | Yes                                    |
| 211 | Resection | -           | -  | +    | np     | MLH1 | NM_000249.3:c.454-13A>G                                      | 0.918:244      | No informative SNPs, VAF is however     | Normal tissue not available            |
| 214 | Resection | subclonal - | +  | +    | np     | MSH2 | NM_000251.2:c.1414C>T (class 3 VUS)                          | 0.156:257      |                                         | Not performed                          |
| 236 | Resection | +           | np | -    | -      | MSH6 | Frameshift variant*                                          | 0.511:1621     |                                         | Yes                                    |
|     |           |             |    |      |        |      | NM_000179.2:c.3172G>T (class 3 VUS)                          | 0.313:1995     |                                         | No                                     |
| 249 | Resection | -           | +  | +    | np     | PMS2 | NM_000535.5:c.2287G>T                                        | 0.159:1233     | No informative SNPs                     | Normal tissue not available            |
|     |           |             |    |      |        |      | NM_000535.5:c.1882C>T                                        | 0.397:315      |                                         |                                        |
| 316 | Resection | +           | np | +/++ | -      | MSH2 | Exon deletion*                                               | Not applicable | Yes                                     | Yes                                    |
| 325 | Resection | +           | np | -    | -      |      | No relevant variants detected                                |                |                                         |                                        |
| 333 | Resection | +           | np | -    | -      | MSH6 | NM_000179.2:c.3128del                                        | 0.185:352      | No informative SNPs                     | Not performed                          |
| 335 | Resection | +           | np | -    | -      | MSH2 | Missense variant classified as likely pathogenic by InSiGHT* | 0.520:1997     | LOH probable based on 1 informative SNP | Yes                                    |
| 344 | Resection | -           | -  | +    | np     | MLH1 | NM_000249.3:c.94_110del                                      | 0.341:1510     | No informative SNPs                     | Not performed                          |
| 363 | Resection | +           | np | -    | -      | MSH2 | Frameshift variant*                                          | 0.499:914      | No based on 1 SNP                       | Yes                                    |
| 379 | Resection | -           | +  | +    | np     | PMS2 | Nonsense variant*                                            | 0.500:1225     | No                                      | Yes                                    |
|     |           |             |    |      |        |      | NM_000535.5:c.1802C>G                                        | 0.421:680      |                                         | No                                     |
| 414 | Resection | +           | np | -    | +/++   | MSH6 | Frameshift variant*                                          | 0.481:1795     | No based on 1 SNP                       | Yes                                    |
|     |           |             |    |      |        |      | NM_000179.2:c.3533del                                        | 0.239:1980     |                                         | No                                     |

|     |           |   |      |           |      |      |                                      |            |                          |                             |
|-----|-----------|---|------|-----------|------|------|--------------------------------------|------------|--------------------------|-----------------------------|
| 426 | Resection | - | -    | +         | np   | MLH1 | Frameshift variant*                  | 0.539:1990 | No informative SNPs      | Yes                         |
| 453 | Resection | - | -    | +         | np   | MLH1 | NM_000249.3:c.791-2A>C (class 3 VUS) | 0.634:1994 | No informative SNPs      | No                          |
| 460 | Resection | + | np   | +/++      | -    | MSH2 | NM_000251.2:c.2557G>T                | 0.241:1312 | Unlikely based on 1 SNP  | Not performed               |
| 466 | Resection | - | -    | +         | np   |      | No relevant variants detected        |            |                          |                             |
| 474 | Resection | + | np   | -         | -    | MSH2 | Frameshift variant*                  | 0.691:676  | Probable based on 1 SNP  | Yes                         |
| 480 | Resection | - | -    | Subclonal | np   | MLH1 | Nonsense variant*                    | 0.744:1999 | yes                      | Yes                         |
|     |           |   |      |           |      | MSH6 | No relevant variants detected        |            | yes                      |                             |
| 526 | Resection | + | np   | -         | -    |      | No relevant variants detected        |            |                          |                             |
| 551 | Resection | - | -    | +         | Np   | MLH1 | NM_000249.3:c.2145_2168del           | 0.578:211  | No informative SNPs      | Normal tissue not available |
| 558 | Resection | - | +    | Subclonal | +/++ | PMS2 | NM_000535.5:c.638del                 | 0.378:1995 | Possibly based on 3 SNPs | No                          |
| 568 | Resection | - | +/++ | +         | np   | PMS2 | NM_000251.2:c.2458+1G>A              | 0.381:1998 | No                       | Not performed               |
| 595 | Resection | + | np   | -         | +/++ | MSH6 | Frameshift variant*                  | 0.453:1190 | No                       | Yes                         |
|     |           |   |      |           |      |      | NM_000179.2:c.2232G>T (class 3 VUS)  | 0.169:349  |                          | No                          |
| 596 | Resection | + | np   | -         | -    | MSH2 | NM_000251.2:c.1861C>T                | 0.491:1611 | No                       | Normal tissue not available |
|     |           |   |      |           |      |      | NM_000251.2:c.2458+1G>A              | 0.271:399  |                          |                             |
| 601 | Resection | + | np   | -         | -    | MSH2 | NM_000251.2:c.1601G>A                | 0.346:619  | No informative SNPs      | Not performed               |
|     |           |   |      |           |      | MSH6 | NM_000179.2:c.1436_1440del           | 0.35:1980  | Yes                      |                             |
| 687 | Resection | - | np   | -         | -    |      | NGS data of insufficient quality     |            |                          |                             |
| 698 | Resection | + | np   | Subclonal | +    |      | NGS data of insufficient quality     |            |                          |                             |
| 710 | Resection | - | +    | +         | np   | PMS2 | NM_000535.5:c.1405A>T                | 0.522:1994 | No                       | Normal tissue not available |

|     |           |   |    |   |        |      |                                  |            |                                      |     |
|-----|-----------|---|----|---|--------|------|----------------------------------|------------|--------------------------------------|-----|
| 720 | Resection | + | np | - | -      | MSH2 | Nonsense variant*                | 0.678:1772 | No                                   | Yes |
| 722 | Resection | + | np | - | + / ++ | MSH6 | Frameshift variant*              | 0.532:342  | no                                   | Yes |
|     |           |   |    |   |        |      | NM_000179.2:c.1444C>T            | 0.285:895  |                                      | No  |
| 723 | Resection | - | -  | + | np     | MLH1 | Frameshift variant*              | 0.937:1449 | Probable based on one SNP and VAF of | Yes |
| 746 | Resection | - | -  | + | np     | MLH1 | Frameshift variant*              | 0.594:1721 | Yes                                  | Yes |
| 748 | Resection | + | np | - | -      |      | NGS data of insufficient quality |            |                                      |     |
| 760 | Resection | - | -  | + | np     | MLH1 | NM_000249.3:c.252del             | 0.498:601  | yes                                  | No  |
